# Supplementary material for: Ab initio study of a 2D h-BAs monolayer: a promising anode material for alkali-metal ion batteries
Source: Royal Society of Chemistry journal article supplement (doi:10.1039/c9cp03242h), 2019-01-01
Supplement: c9cp03242h1.pdf [file c9cp03242h1.pdf]

## Supporting information

### **Ab Initio Study of 2D h-BAs monolayer: A promising anode material for Alkali-Metal Ion Batteries**

N. Khossossi<sup>\*a,c</sup>, A. Banerjee<sup>\*d</sup>, Y. Benhouria<sup>a</sup>, I. Essaoudi<sup>a,c</sup>, A. Ainane<sup>a,b,c</sup>, and R. Ahuja<sup>c,d</sup>

*<sup>a</sup>Laboratoire de Physique des Matériaux et Modélisations des Systèmes, (LP2MS), Unité Associée au CNRST-URAC 08, Moulay Ismail University, Faculty of Sciences, Department of Physics, B.P. 11201, Meknes, Morocco*

*<sup>b</sup>Max-Planck-Institut für Physik Complexer Systeme, NöthnitzerStr. 38 D-01187 Dresden, Germany*

*<sup>c</sup>Condensed Matter Theory Group, Department of Physics and Astronomy, Uppsala University, 75120 Uppsala, Sweden*

*and*

*<sup>d</sup>Applied Materials Physics, Department of Materials and Engineering, Royal Institute of Technology (KTH), S-100 44 Stockholm, Sweden*

---

\* Corresponding authors. Emails:  
n.khossossi@hotmail.com & amitava245@gmail.com

Table S1. The calculated  $E_A$  values for all considered adsorption sites, with respect to the vacuum reference states and bulk-metal reference states.

| Adsorption Sites      | Total Energy of adsorbed state (eV) |          |          | Adsorption of alkali-metals on h-BAs monolayer (eV) |                    |                        |                    |                       |                   |
|-----------------------|-------------------------------------|----------|----------|-----------------------------------------------------|--------------------|------------------------|--------------------|-----------------------|-------------------|
|                       | Li@BAs                              | Na@BAs   | K@BAs    | $E_A$<br>(Li-isolated)                              | $E_A$<br>(Li-bulk) | $E_A$<br>(Na-isolated) | $E_A$<br>(Na-bulk) | $E_A$<br>(K-isolated) | $E_A$<br>(K-bulk) |
| H-site                | -1701,79                            | -1795,98 | -1799,78 | -2.393                                              | -0.422             | -1.658                 | -0.322             | -1.817                | -0.814            |
| T <sub>As</sub> -site | -1701,76                            | -1795,97 | -1799,78 | -1.970                                              | -0.013             | -1.490                 | -0.153             | -1.746                | -0.743            |
| T <sub>B</sub> -site  | -1701,75                            | -1795,96 | -1799,77 | -1.843                                              | 0.113              | -1.333                 | 0.003              | -1.615                | -0.612            |

Figure S1

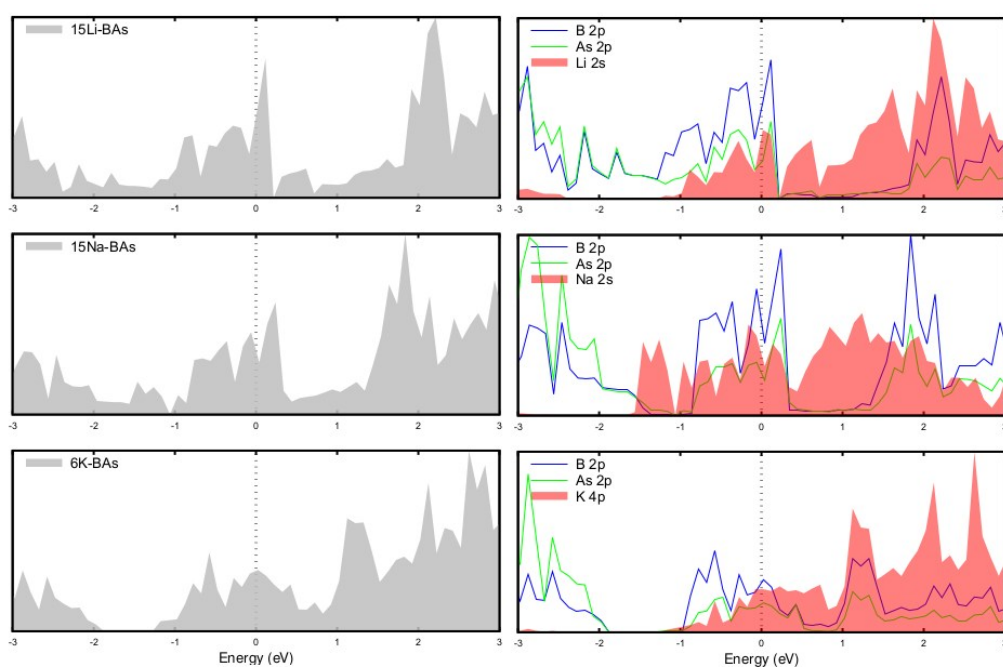

Figure S1. Total and Partial density of states (TDOS & PDOS) of h-BAs monolayer with highest capacity of adatoms. The Fermi levels are set to zero and are indicated by the dashed lines.
